# Supplementary material for: The U1, U2 and U5 snRNAs crosslink to the 5′ exon during yeast pre-mRNA splicing
Source: PubMed Central journal article supplement — Nucleic Acids Res. 2007 Dec 15;36(3):814–25. doi: 10.1093/nar/gkm1098 (PMC2241886; doi:10.1093/nar/gkm1098), 2007-12-15
Supplement: nar_gkm1098_1.pdf [file nar_gkm1098_1.pdf]

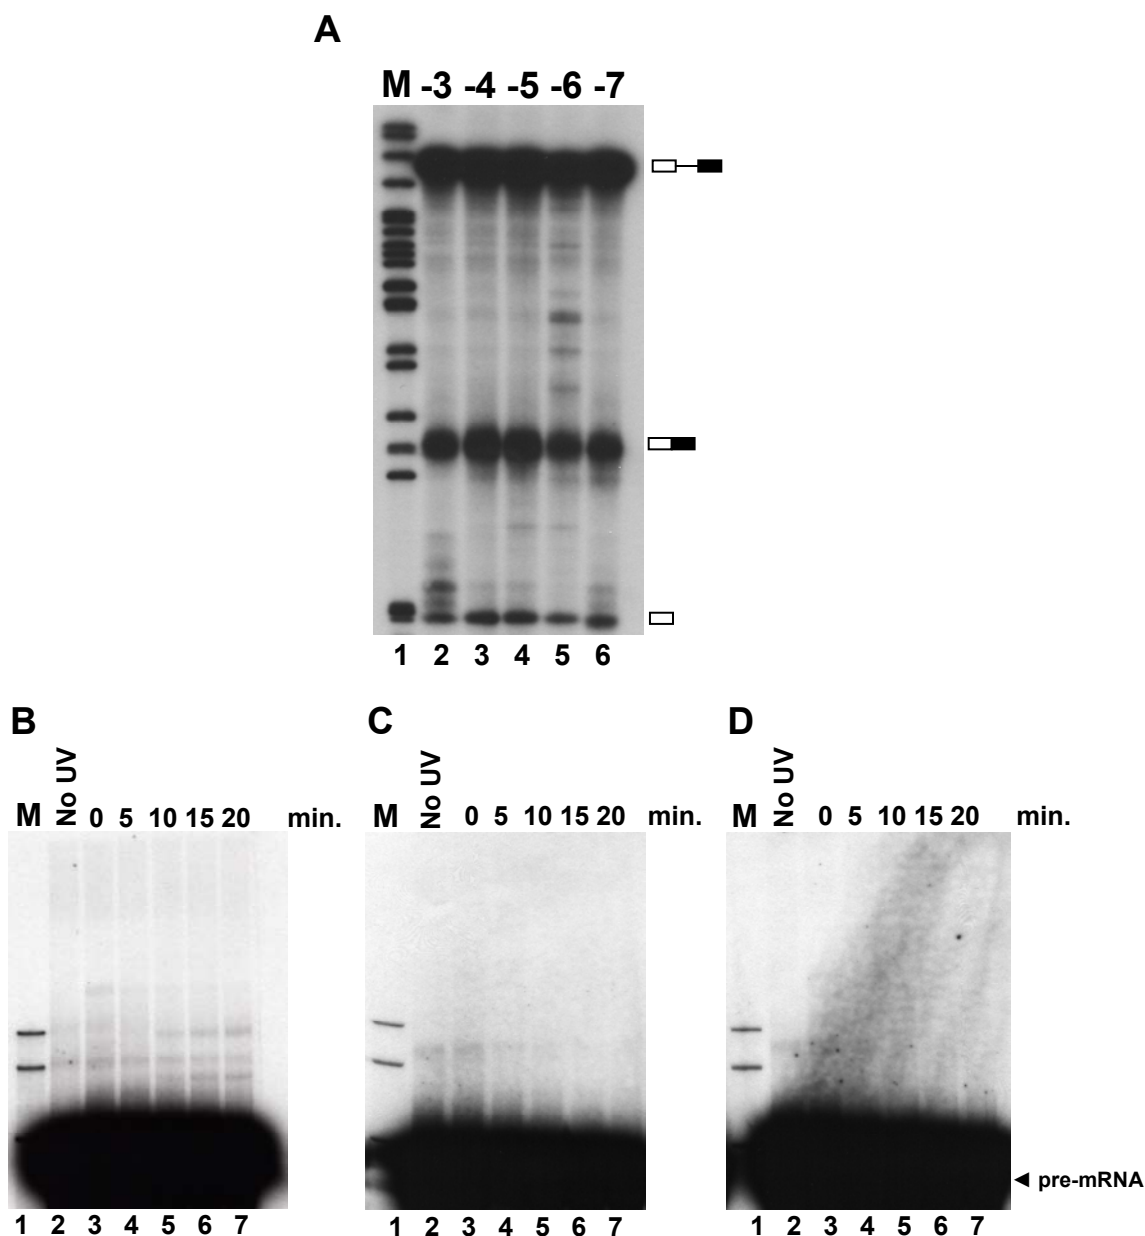

**Figure S1.** Pre-mRNA splicing of 4-thioU containing pre-mRNA and crosslinking with non-4-thioU containing pre-mRNA.

(A) *In vitro* splicing of the five different 4-thioU containing *CYH2* pre-mRNA utilized for crosslinking. All the 4-thioU pre-mRNAs are correctly spliced as indicated by the appearance of the first step 5' exon intermediate and the second step mRNA product following 25 min. splicing *in vitro*. The lariat intron-3' exon intermediate and the lariat intron product are not visible by autoradiography as there is a single  $^{32}\text{P}$  in the 5' exon. (B) *In vitro* splicing time course using *CYH2* pre-mRNA without 4-thioU. This pre-mRNA is a control for the (-3), (-4) and (-6) 4-thioU containing pre-mRNAs. Zero time point with no UV irradiation (lane 2). Samples were withdrawn at 5 minute intervals from 23°C and UV irradiated (lanes 3-7). (C) *In vitro* splicing time course using *CYH2* pre-mRNA without 4-thioU and a C to U sequence change at position (-5). Lanes as in (B). (D) *In vitro* splicing time course using *CYH2* pre-mRNA without 4-thioU and a G to U sequence change at position (-7). Lanes as in (B).
